# Supplementary material
Source: PubMed Central journal article supplement (PMC5736451)
Supplement: NIHMS914045-supplement-Supplemental_Tables.pdf [file NIHMS914045-supplement-Supplemental_Tables.pdf]

**Supplemental Table 1:** Details of prospective clinical trials on which patients analyzed in this study were treated.

| <b>Trial</b>              | <b>Title</b>                                                                                                                                                                     | <b>Radiation</b>                                                                                                                               | <b>Concurrent Chemotherapy</b>                       | <b>Adjuvant Chemotherapy</b>                          |
|---------------------------|----------------------------------------------------------------------------------------------------------------------------------------------------------------------------------|------------------------------------------------------------------------------------------------------------------------------------------------|------------------------------------------------------|-------------------------------------------------------|
| 2003.073<br>(NCT: n/a)    | A Phase I/II Randomized Trial in Radiation Dose Escalation and Timing of Concurrent Chemotherapy for Patients with Stage III Unresectable/Inoperable Non-small Cell Lung Cancer. | 2 Gy M-W<br>2.35-3.8 Gy Th-F<br>≤15% NTCP for Grade ≥ 2 RILT (Target EQD2 between 64-89 Gy in 30 fractions)                                    | Paclitaxel 45 mg/m <sup>2</sup><br>Carboplatin AUC 2 | Paclitaxel 200 mg/m <sup>2</sup><br>Carboplatin AUC 6 |
| 2003.076<br>(NCT: n/a)    | A Pilot Study to Evaluate the Impact of Multiple Functional Images and Molecular Markers on Radiation Treatment Planning and Radiation Outcome and Lung Toxicity Prediction.     | Determined by radiation oncologist, 2 Gy daily to cumulative dose <74 Gy                                                                       | Per treating physician                               | Per treating physician                                |
| 2006.040<br>(NCT00603057) | Using Functional Image and Circulating Molecular Markers to Predict Tumor Response and Lung Toxicity in Treatment of Lung Cancer.                                                | Determined by radiation oncologist 2 Gy daily to cumulative dose <74 Gy                                                                        | Per treating physician                               | Per treating physician                                |
| 2007.123<br>(NCT01190527) | Using FDG-PET Acquired During the Course of Radiation Therapy to Individualize Adaptive Radiation Dose Escalation in Patients with Non-Small Cell Lung Cancer.                   | 2.1-2.85 Gy daily initially, then escalated per protocol<br>≤17.2% NTCP for Grade ≥ 2 RILT (Target dose EQD2 between 64-92 Gy in 30 fractions) | Paclitaxel 45 mg/m <sup>2</sup><br>Carboplatin AUC 2 | Paclitaxel 200 mg/m <sup>2</sup><br>Carboplatin AUC 6 |

AUC = Area under curve. NTCP = normal tissue complication probability. EQD2 = equivalent to daily 2-Gy fractions. Gy = Gray.

**Supplemental Table 2:** MiRNA species included in qRT-PCR assay.

|             |             |             |             |
|-------------|-------------|-------------|-------------|
| let-7a-5p   | miR-192-5p  | miR-27a-3p  | miR-145-5p  |
| let-7c      | miR-195-5p  | miR-296-5p  | miR-148a-3p |
| miR-106b-5p | miR-19a-3p  | miR-29a-3p  | miR-15a-5p  |
| miR-10b-5p  | miR-19b-3p  | miR-30d-5p  | miR-193a-5p |
| miR-122-5p  | miR-200b-3p | miR-34a-5p  | miR-26b-5p  |
| miR-124-3p  | miR-200c-3p | miR-375     | miR-30e-5p  |
| miR-125b-5p | miR-205-5p  | miR-423-5p  | miR-374a-5p |
| miR-126-3p  | miR-20a-5p  | miR-574-3p  | miR-7-5p    |
| miR-134     | miR-21-5p   | miR-885-5p  | miR-103a-3p |
| miR-143-3p  | miR-210     | miR-92a-3p  | miR-15b-5p  |
| miR-146a-5p | miR-221-3p  | miR-93-5p   | miR-16-5p   |
| miR-150-5p  | miR-222-3p  | miR-100-5p  | miR-191-5p  |
| miR-155-5p  | miR-223-3p  | miR-10a-5p  | miR-22-3p   |
| miR-17-5p   | miR-224-5p  | miR-128     | miR-24-3p   |
| miR-17-3p   | miR-23a-3p  | miR-130b-3p | miR-26a-5p  |
| miR-18a-5p  | miR-25-3p   |             |             |

**Supplemental Table 3:** Patient and disease characteristics of the 173 patients treated on the 4 prospective institutional clinical trials referenced in the main text.

| <b>Parameter</b>      | <b>Value</b> |
|-----------------------|--------------|
| Age (years)           |              |
| Mean (Std. Dev.)      | 66.6 (9.7)   |
| Median                | 65.7         |
| KPS                   |              |
| Mean (Std. Dev.)      | 84 (10.1)    |
| Median                | 85           |
| Sex (n(%))            |              |
| Male                  | 65 (78.3%)   |
| Female                | 18 (21.7%)   |
| Smoking Status (n(%)) |              |
| Non-smoker            | 7 (4.0%)     |
| Former-smoker         | 82 (47.4%)   |
| Current-smoker        | 73 (42.2%)   |
| Unknown               | 11 (6.4%)    |
| TNM Stage (n(%))      |              |
| I                     | 34 (19.6%)   |
| II                    | 23 (13.3%)   |
| III                   | 115 (66.5%)  |
| IV                    | 1 (0.6%)     |

KPS = Karnofsky performance status. Std. Dev. = standard deviation.
